# Supplementary material
Source: PubMed Central journal article supplement (PMC8206219)

**Supplemental Appendix. CONSORT Diagram**

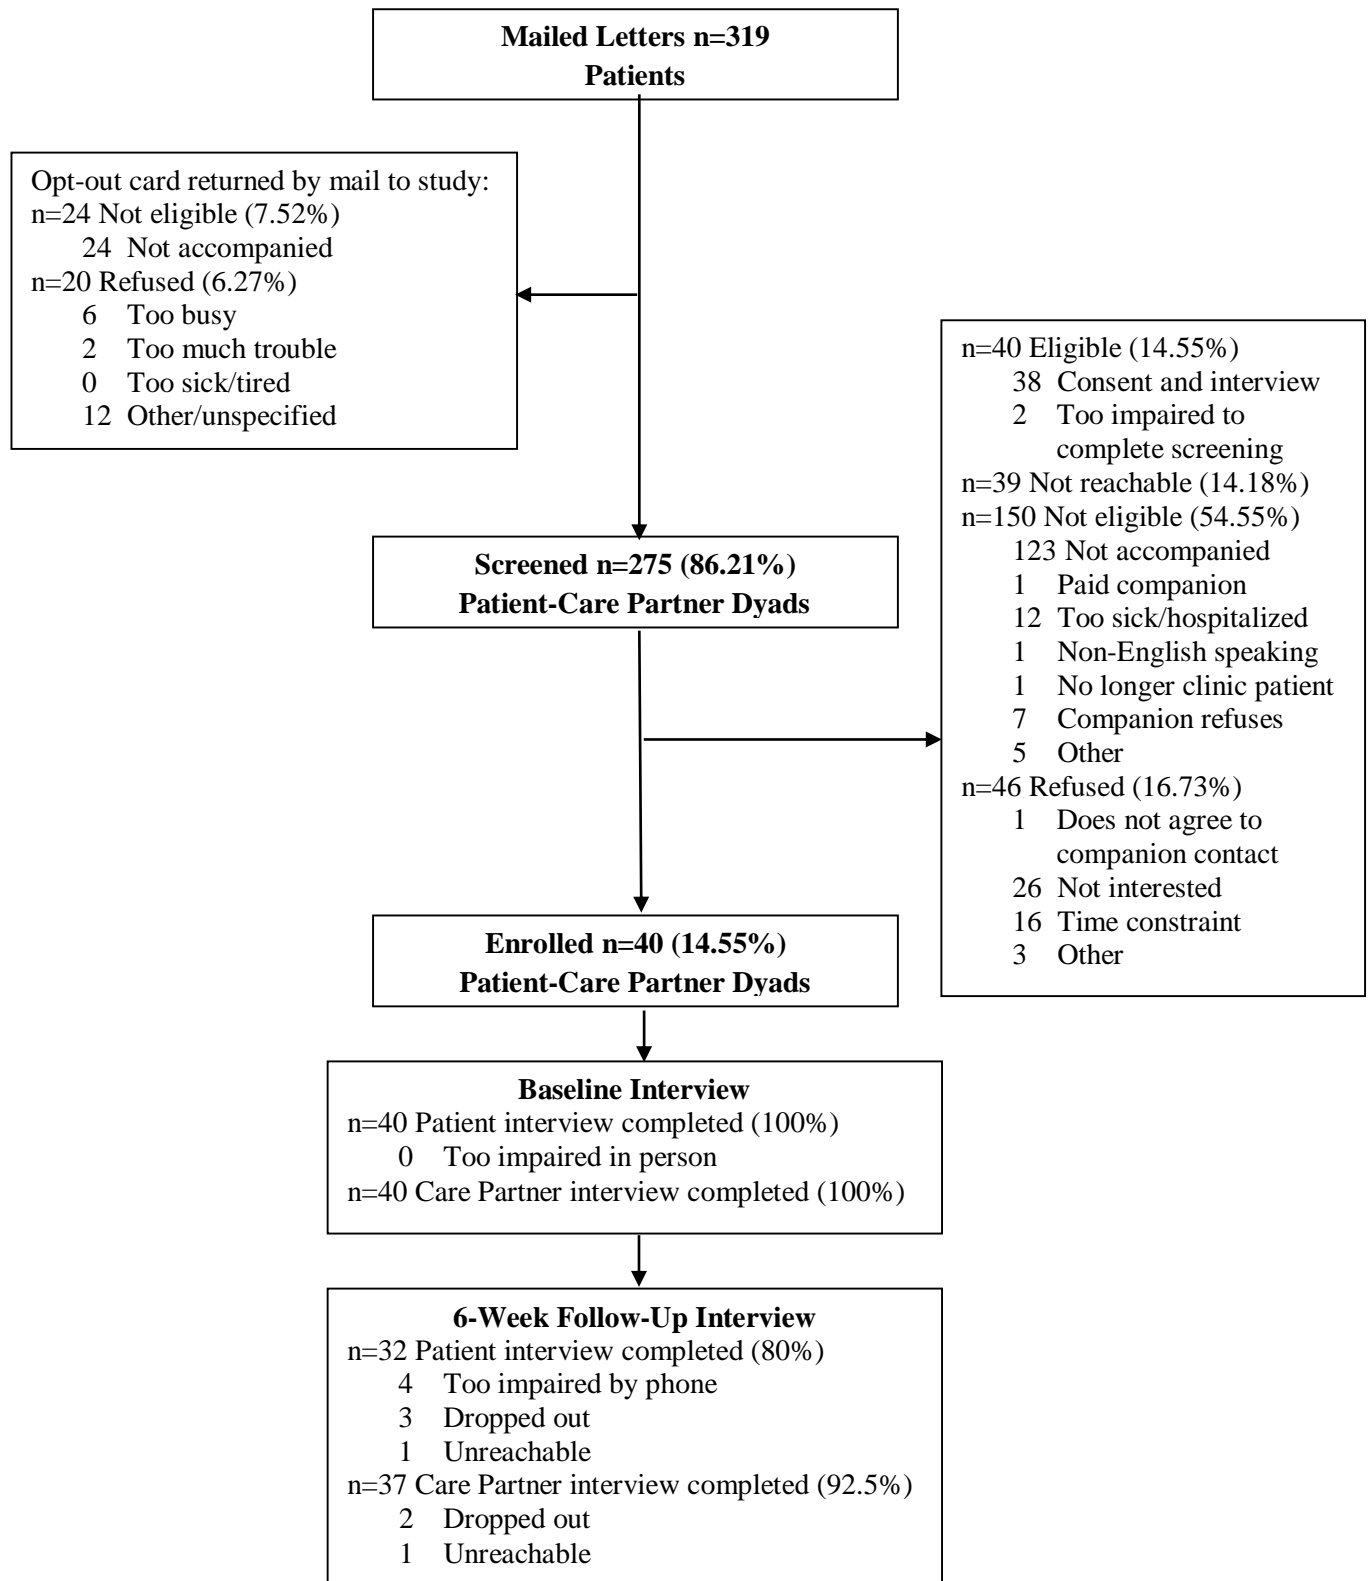

Supplement: NIHMS1702131-supplement-1.pdf [file NIHMS1702131-supplement-1.pdf]
